# Supplementary material for: Low-temperature and one-pot synthesis of sulfurized graphene nanosheets via in situ doping and their superior electrocatalytic activity for oxygen reduction reaction
Source: Royal Society of Chemistry journal article supplement (doi:10.1039/c4ta04938a), 2014-01-01
Supplement: c4ta04938a1.pdf [file c4ta04938a1.pdf]

## Electronic Supplementary Information (ESI)

### **Low-Temperature and One-Pot Synthesis of Sulfurized Graphene Nanosheets via in Situ Doping and their Superior Electrocatalytic Activity for Oxygen Reduction Reaction**

Yi Chen, Jing Li, Tao Mei, Xian'gang Hu, Dengwu Liu, Juncheng Wang, Ming Hao jinhua Li, jianying Wang and Xianbao Wang\*

Hubei Collaborative Innovation Center for Advanced Organic Chemical Materials, Ministry-of-Education Key Laboratory for the Green Preparation and Application of Functional Materials, Faculty of Materials Science and Engineering, Hubei University, Wuhan 430062, PR China.

\*To whom correspondence should be addressed. Tel: +86-27-8866 2132, Fax: +86-27- 8866 5610, E-mail: [wangxb68@aliyun.com](mailto:wangxb68@aliyun.com)

### **Preparation of graphene oxide**

GO was prepared via a modified Staudenmaier's method according to our previous work.<sup>1</sup> The detailed procedure was as follows. Sulfuric acid (72 mL) and nitric acid (36 mL) were first poured into a flask. The flask was then immersed in an ice bath and Natural graphite (4 g) was added into it under vigorous stirring to avoid agglomeration. After that the potassium chlorate (44 g) was slowly added for 1 hour to avoid the rapid increase of temperature. The flask was then allowed to stir for 96 h at room temperature. In order to avoid environment pollution, sodium hydroxide solution was employed to absorb the generated chlorine. After that the mixture was slowly poured into a beaker and then filtered. The products were then dissolved in deionized water and washed by 5% HCl solution twice in order to remove sulfate ions. After that the resulting graphite oxide was re-dissolved in water and ultrasonicated for 30 min to further exfoliate the graphene oxide sheets, and then centrifuged at 8000 r/min for 10 min in order to remove the unexfoliated graphite. The collected supernatant was brown-yellow GO solution with homogeneous dispersion. 20 mL of

NaOH (5 mol L<sup>-1</sup>) was then added into the GO solution (1000 mL) with stirring. After standing for 1 h, GO was coagulated from the GO solution. Solid GO was filtered and washed with ethanol until neutral in order to remove excessive NaOH. The GO solids were obtained after dried under vacuum at 40 °C.

S1 J. C. Wang, X. B. Wang, L. Wan, Y. K. Yang and S. M. Wang, *Chin. J. Chem.* 2010, **28**, 1935.
